# Supplementary material
Source: Research Square preprint supplement (doi:10.21203/rs.3.rs-9423236/v1)
Supplement: Supplementary file 1 [file 2be37aa6d7f7b710a5189442.docx]

| Table 1: Variables Measurements | | |
| --- | --- | --- |
| Variable | Abbreviations | Definition |
| Cybersecurity Disclosure (dummy) | CYB DISC (D) | Cybersecurity disclosure is represented as a binary variable, where the value is 1 cybersecurity is present in the firm’s annual report or 0 if does not. |
| Cybersecurity Disclosure (No. of Words) | CYB DISC (W) | Cybersecurity disclosure is the natural logarithm of total number of frequency of words |
| Cyber security Disclosure (frequency of words) | CYB DISC (F) | Cybersecurity disclosure, measured by the number of cybersecurity related words with total number of words in annual report. |
| Board Independence | BRD IND | Percentage of independent board members |
| Board Technical Skills | BRD TEC SKL | The Proportion of those on the board possessing technical skills. |
| Firm Size | LN_TA | Firm size is natural logarithm of firm total assets |
| Board size | BS | The total number of directors sitting on the board of directors |
| Profitability | ROA | Net Income divided by total assets |
| CEO Duality | DUA | CEO duality is a binary variable, which tells that if the CEO is chairing the firm, then it is considered as 1 or if not then zero. |
| Whistle Blower Protection | WBP | Encompasses the legal safeguards, confidentiality provisions, and anti-retaliation measures that encourage employees to report illegal or unethical practices without fear of reprisal. |
| Audit Committee Independence | ACI | Structural and operational autonomy of audit committee members from management influence, enabling them to oversee financial reporting quality, internal controls. |
| Leverage | LEV | As the total liabilities divided by total assets |
| Net Profit Margin | NPMP | The ratio of net income and total assets |
| Source: Author Owned Developed | | |

| Table 2: Country Classification of Sample | | | | | |
| --- | --- | --- | --- | --- | --- |
|  | Developed Economy (A) | |  | Emerging Economy (B) | |
|  | Number of Firms | Percent |  | Number of Firms | Percentage |
| United States of America | 465 | 35.77 | India | 42 | 3.23 |
| Japan | 129 | 9.92 | Taiwan | 38 | 2.92 |
| United Kingdom | 67 | 5.15 | South Africa | 26 | 2 |
| Hong Kong | 52 | 4 | Malaysia | 24 | 1.85 |
| Germany | 29 | 2.23 | Thailand | 23 | 1.77 |
| Canada | 50 | 3.85 | Saudi Arabia | 17 | 1.31 |
| Australia | 40 | 3.08 | China | 14 | 1.08 |
| Switzerland | 36 | 2.77 | Indonesia | 11 | 0.85 |
| Sweden | 32 | 2.46 | Philippines | 11 | 0.85 |
| Ireland; Republic of | 17 | 1.31 | Brazil | 8 | 0.62 |
| Singapore | 17 | 1.31 | Turkey | 8 | 0.62 |
| Netherlands | 16 | 1.23 | Mexico | 7 | 0.54 |
| Korea; Republic (S. Korea) | 13 | 1 | Qatar | 7 | 0.54 |
| Spain | 12 | 0.92 | Chile | 5 | 0.38 |
| Denmark | 8 | 0.62 | United Arab Emirates | 5 | 0.38 |
| Belgium | 8 | 0.62 | Poland | 4 | 0.31 |
| Norway | 8 | 0.62 | Kuwait | 3 | 0.23 |
| Italy | 7 | 0.54 | Egypt | 2 | 0.15 |
| New Zealand | 7 | 0.54 | Portugal | 2 | 0.15 |
| Finland | 5 | 0.38 | Colombia | 1 | 0.08 |
| Austria | 4 | 0.31 | Greece | 1 | 0.08 |
| France | 4 | 0.31 | Hungary | 1 | 0.08 |
| Israel | 4 | 0.31 | Peru | 1 | 0.08 |
| Luxembourg | 4 | 0.31 | Sub Total (B) = 23 | 261 | 20.1 |
| Bermuda | 3 | 0.23 |  |  |  |
| Isle of Man | 1 | 0.08 | **Grand Total (A+B)** | **1300** | **100** |
| Uruguay | 1 | 0.08 |  |  |  |
| Sub Total (A) = 27 | 1039 | 79.9 |  |  |  |
| Source: Authors Compilations | | | | | |

| Table 3: Industrial Classification and Distribution of Firms | | |
| --- | --- | --- |
| Industry | No. of Firms | Percent |
| Capital Goods | 147 | 11.31 |
| Banks | 117 | 9 |
| Materials | 101 | 7.77 |
| Financial Services | 78 | 6 |
| Utilities | 77 | 5.92 |
| Energy | 59 | 4.54 |
| Food, Beverage & Tobacco | 58 | 4.46 |
| Insurance | 58 | 4.46 |
| Health Care Equipment & Services | 57 | 4.38 |
| Pharmaceuticals, Biotechnology & Life Sciences | 50 | 3.85 |
| Technology Hardware & Equipment | 49 | 3.77 |
| Software & Services | 47 | 3.62 |
| Transportation | 46 | 3.54 |
| Equity Real Estate Investment Trusts (REITs) | 40 | 3.08 |
| Consumer Discretionary Distribution & Retail | 37 | 2.85 |
| Consumer Durables & Apparel | 33 | 2.54 |
| Consumer Services | 33 | 2.54 |
| Semiconductors & Semiconductor Equipment | 33 | 2.54 |
| Real Estate Management & Development | 32 | 2.46 |
| Commercial & Professional Services | 31 | 2.38 |
| Consumer Staples Distribution & Retail | 26 | 2 |
| Media & Entertainment | 26 | 2 |
| Telecommunication Services | 26 | 2 |
| Automobiles & Components | 25 | 1.91 |
| Household & Personal Products | 14 | 1.08 |
| **Total** | **1300** | **100** |
| Source: Authors Compilations |  |  |

# Tables

| Table: 4: Descriptive Statistics | | | | | | |
| --- | --- | --- | --- | --- | --- | --- |
| Variables | N | Mean | Median | SD | Min | Max |
| CYB DISC | 10,056 | 3.826 | 3.912 | 1.115 | 0 | 7.354 |
| BRD IND | 10,056 | 77.68 | 83.333 | 19.03 | 3.703 | 100 |
| BRD TEC EXP | 10,056 | 51.26 | 50 | 20.74 | 3.448 | 100 |
| LN TA | 10,056 | 23.55 | 23.433 | 1.621 | 17.01 | 30.47 |
| BS | 10,056 | 11.12 | 11 | 3.048 | 5 | 21 |
| ROA | 10,056 | 6.883 | 5.4 | 6.293 | -4.9 | 30.41 |
| DUA | 10,056 | 0.397 | 0 | 0.489 | 0 | 1 |
| WBP | 10,056 | 65.17 | 64.633 | 4.822 | 50 | 86.43 |
| ACI | 10056 | 89.36 | 100 | 21.25 | 0 | 100 |
| LEV | 10,056 | 4.085 | 4.202 | 1.14 | 1.347 | 5.967 |
| NPMP | 10,056 | 2.352 | 2.387 | 0.886 | 0.592 | 3.856 |
| Note(s): CYB DISC= Cybersecurity Disclosure; BRD IND= Board Independence; BRD TEC EXP= Board Technical Expertise; LN TA= Natural log of total assets; BS= Board Size; ROA= Return on Assets; DUA= Role Duality; WBP= Whistleblower Protection; ACI= Audit Committee Independence; LEV= Leverage; NPMP= Net profit margin | | | | | | |

| Table 5: Correlation Matrix | | | | | | | | |
| --- | --- | --- | --- | --- | --- | --- | --- | --- |
| Variables | (1) | (2) | (3) | (4) | (5) | (6) | (7) | (8) | (9) | (10) | (11) |
| (1) CYB DISC | 1 |  |  |  |  |  |  |  |  |  |  |
|  | 0 |  |  |  |  |  |  |  |  |  |  |
| (2) BRD IND | 0.155* | 1 |  |  |  |  |  |  |  |  |  |
|  | 0 |  |  |  |  |  |  |  |  |  |  |
| (3) BRD TEC SKL | 0.132* | 0.390* | 1 |  |  |  |  |  |  |  |  |
|  | 0 | 0 |  |  |  |  |  |  |  |  |  |
| (4) LN_TA | 0.285* | 0.062* | 0.056* | 1 |  |  |  |  |  |  |  |
|  | 0 | 0 | 0 |  |  |  |  |  |  |  |  |
| (5) BS | 0.035* | -0.074* | -0.091* | 0.395* | 1 |  |  |  |  |  |  |
|  | 0 | 0 | 0 | 0 |  |  |  |  |  |  |  |
| (6) ROA | -0.194* | 0.020* | 0.047* | -0.464* | -0.214* | 1 |  |  |  |  |  |
|  | 0 | 0.036 | 0 | 0 | 0 |  |  |  |  |  |  |
| (7) DUALITY | -0.158* | 0.063* | 0.122* | 0.027* | 0.993 | 0.092* | 1 |  |  |  |  |
|  | 0 | 0 | 0 | 0.006 | 0 | 0 |  |  |  |  |  |
| (8) WHLBLW | 0.056* | 0.306* | 0.038* | 0.032* | 0.057* | 0.067* | 0.124* | 1 |  |  |  |
|  | 0 | 0 | 0 | 0.001 | 0 | 0 | 0 |  |  |  |  |
| (9) ACI | 0.007 | 0.230* | 0.130* | -0.034* | -0.108* | 0.108* | 0.153* | 0.225* | 1 |  |  |
|  | 0.478 | 0 | 0 | 0.001 | 0 | 0 | 0 | 0 |  |  |  |
| (10) LEV | 0.111* | 0.128* | -0.064* | 0.316* | 0.119* | -0.318* | 0.046* | 0.030* | 0.078* | 1 |  |
|  | 0 | 0 | 0 | 0 | 0 | 0 | 0 | 0.002 | 0 |  |  |
| (11) NPMP | 0.145* | 0.133* | 0.003 | 0.073* | -0.058* | 0.240* | -0.021* | 0.001 | 0.059* | -0.089* | 1 |
|  | 0 | 0 | 0.782 | 0 | 0 | 0 | 0.035 | 0.891 | 0 | 0 |  |
| Note(s): *, **, and *** indicate significance at 10%, 5%, and 1% respectively. wherein, CYB DISC= Cybersecurity Disclosure; BRD IND= Board Independence; BRD TEC EXP= Board Technical Expertise; LN TA= Natural log of total assets; BS= Board Size; ROA= Return on Assets; DUA= Role Duality; WBP= Whistleblower Protection; ACI= Audit Committee Independence; LEV= Leverage; NPMP= Net Profit Margin | | | | | | | | |

| Table 6: Baseline Fixed-Effect Regression | | | | |
| --- | --- | --- | --- | --- |
|  | (1) | (2) | (3) | (4) |
| Variables | CYB DISC | CYB DISC | CYB DISC | CYB DISC |
| BRD IND | 0.012*** | 0.006*** | 0.006*** | 0.007*** |
|  | 0.001 | 0.001 | 0.001 | 0.001 |
| BRD TEC SKL |  |  | 0.001** | 0.001** |
|  |  |  | 0 | 0 |
| BRD IND * BRD TEC SKL |  |  |  | 0.000** |
|  |  |  |  | 0 |
| LN_TA |  | 0.623*** | 0.620*** | 0.619*** |
|  |  | 0.023 | 0.023 | 0.023 |
| BS |  | -0.032*** | -0.031*** | -0.031*** |
|  |  | 0.004 | 0.004 | 0.004 |
| ROA |  | 0.006** | 0.006** | 0.006** |
|  |  | 0.002 | 0.002 | 0.002 |
| DUA |  | -0.068** | -0.071** | -0.070** |
|  |  | 0.028 | 0.028 | 0.028 |
| WBP |  | 0.332*** | 0.332*** | 0.331*** |
|  |  | 0.03 | 0.03 | 0.03 |
| ACI |  | 0.001*** | 0.001*** | 0.001*** |
|  |  | 0 | 0 | 0 |
| LEV |  | 0.000*** | 0.000*** | 0.000*** |
|  |  | 0 | 0 | 0 |
| NPMP |  | 0.044** | 0.044** | 0.044** |
|  |  | 0.018 | 0.018 | 0.018 |
| Constant | 2.918*** | -11.362*** | -11.388*** | -11.423*** |
|  | 0.084 | 0.532 | 0.532 | 0.532 |
| Year F.E. | Yes | Yes | Yes | Yes |
| Firm F.E. | Yes | Yes | Yes | Yes |
| Observations | 10,056 | 10,056 | 10,056 | 10,056 |
| R-squared | 0.013 | 0.133 | 0.134 | 0.135 |
| Note(s): *, **, and *** indicate significance at 10%, 5%, and 1% respectively. wherein, CYB DISC= Cybersecurity Disclosure; BRD IND= Board Independence; BRD TEC EXP= Board Technical Expertise; LN TA= Natural log of total assets; BS= Board Size; ROA= Return on Assets; DUA= Role Duality; WBP= Whistleblower Protection; ACI= Audit Committee Independence; LEV= Leverage; NPMP= Net Profit Margin | | | | |

| Table 7: Alternative Dependent Variables | | |
| --- | --- | --- |
|  | Dummy | Fre. of Word |
| Variables | CYB DISC (1) | CYB DISC (2) |
| BRD IND | 0.016*** | 0.004*** |
|  | 0.001 | 0.001 |
| BRD TEC SKL | 0.004*** | 0.001** |
|  | 0.001 | 0 |
| BRD IND * BRD TEC SKL | 0.000* | 0.000*** |
|  | 0 | 0 |
| LN_TA | 0.255*** | 0.332*** |
|  | 0.022 | 0.017 |
| BS | -0.008 | -0.020*** |
|  | 0.008 | 0.003 |
| ROA | 0.023*** | 0.007*** |
|  | 0.005 | 0.001 |
| DUA | -0.068 | -0.057*** |
|  | 0.051 | 0.022 |
| WBP | 0.332*** | 0.331*** |
|  | 0.03 | 0.03 |
| ACI | 0.003*** | 0.012*** |
|  | 0.001 | 0.001 |
| LEV | 0.001*** | 0.000** |
|  | 0 | 0 |
| NPMP | -0.028 | 0 |
|  | 0.03 | 0 |
| Constant | -6.898*** | -15.616*** |
|  | 0.50 | 0.40 |
| Year F.E. | Yes | Yes |
| Firm F.E. | Yes | Yes |
| Observations | 10,056 | 10,794 |
| R-squared | 0.054 | 0.109 |
| Note(s): *, **, and *** indicate significance at 10%, 5%, and 1% respectively. wherein, CYB DISC= Cybersecurity Disclosure; BRD IND= Board Independence; BRD TEC EXP= Board Technical Expertise; LN TA= Natural log of total assets; BS= Board Size; ROA= Return on Assets; DUA= Role Duality; WBP= Whistleblower Protection; ACI= Audit Committee Independence; LEV= Leverage; NPMP= Net Profit Margin | | |

| Table 8: Alternative Independent Variable and Moderating Variable | | |
| --- | --- | --- |
|  | Alternative I.V | Alternative M.V |
| Variables | CYB DISC (1) | CYB DISC (2) |
| BRD IND |  | 0.005*** |
|  |  | 0.001 |
| BGDP | 0.023*** |  |
|  | 0.001 |  |
| ADT COM EXP |  | 0.116*** |
|  |  | 0.031 |
| BRD IND * ADT COM EXP |  | 0.003* |
|  |  | 0.001 |
| BRD TEC SKL | 0.001** |  |
|  | 0 |  |
| BGDP* BRD TEC SKL | 0.000* |  |
|  | 0 |  |
| LN_TA | 0.620*** | 0.620*** |
|  | 0.023 | 0.023 |
| BS | -0.021*** | -0.032*** |
|  | 0.004 | 0.004 |
| ROA | 0.003 | 0.006** |
|  | 0.002 | 0.002 |
| DUA | -0.068** | -0.071** |
|  | 0.027 | 0.028 |
| WBP | 0.382*** | 0.322*** |
|  | 0.029 | 0.03 |
| ACI | 0.002*** | 0.001*** |
|  | 0 | 0 |
| LEV | 0.000*** | 0.000*** |
|  | 0 | 0 |
| NPMP | -0.000** | 0.042** |
|  | 0 | 0.018 |
| Constant | 3.346*** | -11.248*** |
|  | 0.063 | 0.533 |
| Year F.E. | Yes | Yes |
| Firm F.E. | Yes | Yes |
| Observations | 10,794 | 10,056 |
| R-squared | 0.11 | 0.135 |
| Note(s): *, **, and *** indicate significance at 10%, 5%, and 1% respectively. wherein, CYB DISC= Cybersecurity Disclosure; BRD IND= Board Independence; BRD TEC EXP= Board Technical Expertise; LN TA= Natural log of total assets; BS= Board Size; ROA= Return on Assets; DUA= Role Duality; WBP= Whistleblower Protection; ACI= Audit Committee Independence; LEV= Leverage; NPMP= Net Profit Margin | | |

| Table 9: Lagged Variable and Additional Control Variables | | | |
| --- | --- | --- | --- |
|  | Lagged D.V | Lagged I.V | Additional Controls |
| Variables | L.CY B DISC (1) | CYB DISC (2) | CYB DISC (3) |
| BRD IND | 0.011*** |  | 0.007*** |
|  | 0.001 |  | 0.001 |
| L. BRD IND |  | 0.008*** |  |
|  |  | 0.001 |  |
| BRD TEC EXP | 0.001** | 0.001** | 0.001** |
|  | 0 | 0 | 0 |
| BRD IND* BRD TEC EXP | 0.000** | 0.000* | 0.000** |
|  | 0 | 0 | 0 |
| LN_TA |  |  | 0.583*** |
|  |  |  | 0.024 |
| BS | -0.011*** | -0.023*** | -0.031*** |
|  | 0.004 | 0.004 | 0.004 |
| ROA | -0.002 | 0 | 0.006** |
|  | 0.002 | -0.003 | 0.002 |
| DUA | -0.002 | -0.017 | -0.066** |
|  | 0.031 | 0.033 | 0.028 |
| WBP | 0.432*** | 0.454*** | 0.306*** |
|  | 0.032 | 0.034 | 0.03 |
| ACI | 0.002*** | 0.003*** | 0.001*** |
|  | 0 | 0 | 0 |
| LEV | 0.000*** | 0.000*** | 0.000*** |
|  | 0 | 0 | 0 |
| NPMP | 0.071*** | 0.083*** | 0.041** |
|  | 0.019 | 0.02 | 0.018 |
| CSRSUSCOMSCR |  |  | 0.001 |
|  |  |  | 0 |
| EISCR |  |  | 0.003*** |
|  |  |  | 0 |
| Constant | 2.547*** | 3.028*** | -10.671*** |
|  | 0.125 | 0.124 | 0.55 |
| Year F.E. | Yes | Yes | Yes |
| Firm F.E. | Yes | Yes | Yes |
| Observations | 8,590 | 8,590 | 10,052 |
| R-squared | 0.049 | 0.048 | 0.138 |
| Note(s): *, **, and *** indicate significance at 10%, 5%, and 1% respectively. wherein, CYB DISC= Cybersecurity Disclosure; BRD IND= Board Independence; BRD TEC EXP= Board Technical Expertise; LN TA= Natural log of total assets; BS= Board Size; ROA= Return on Assets; DUA= Role Duality; WBP= Whistleblower Protection; ACI= Audit Committee Independence; LEV= Leverage; NPMP= Net Profit Margin; CSRSUSCOMSCR= CSR Sustainability Committee Score; EICSR= Environmental Innovation Score” | | | |

| Table 10: Checking Endogeneity with system GMM and 2SLS | | |
| --- | --- | --- |
|  | GMM | 2SLS |
| Variables | CYB DISC (1) | CYB DISC (2) |
| L. CYB DISC | 0.574*** |  |
|  | 0.037 |  |
| BRD IND | 0.015*** | 0.018** |
|  | 0.003 | 0.009 |
| BRD TEC EXP | 0.002*** | 0.016*** |
|  | 0.001 | 0.004 |
| BRD IND* BRD TEC EXP | 0.000* | 0.002*** |
|  | 0 | 0.001 |
| LN_TA | 0.191*** | 0.178*** |
|  | 0.018 | 0.018 |
| BS | 0.020*** | -0.066*** |
|  | 0.007 | 0.013 |
| ROA | -0.014*** | -0.018*** |
|  | 0.003 | 0.004 |
| DUA | -0.360*** | -0.223*** |
|  | 0.043 | 0.057 |
| WBP | 0.351*** | 0.322*** |
|  | 0.083 | 0.03 |
| ACI | 0.001*** | 0.002*** |
|  | 0 | 0 |
| LEV | 0 | -0.000* |
|  | 0 | 0 |
| NPMP | 0.137*** | 0.253*** |
|  | 0.025 | 0.033 |
| Constant | -1.843*** | 3.725*** |
|  | 0.46 | 1.338 |
| Year Fixed Effect | YES | YES |
| Firm Fixed Effect | YES | YES |
| Observations | 10,056 | 10,056 |
| R-Squared |  | 0.0832 |
| Endogeneity test (p-value) |  | 0.004 |
| AR(1) | 0 |  |
| AR(2) | 0.384 |  |
| Sargan test (p-value) | 0.679 |  |
| Hansen test (p-value) | 0.342 |  |
| Note(s): *, **, and *** indicate significance at 10%, 5%, and 1% respectively. wherein, CYB DISC= Cybersecurity Disclosure; BRD IND= Board Independence; BRD TEC EXP= Board Technical Expertise; LN TA= Natural log of total assets; BS= Board Size; ROA= Return on Assets; DUA= Role Duality; WBP= Whistleblower Protection; ACI= Audit Committee Independence; LEV= Leverage; NPMP= Net Profit Margin | | |

| Table 11: Effects of Global Crisis Event | |
| --- | --- |
| Variables | CYB DISC (1) |
| BRD IND | 0.002** |
|  | 0.001 |
| BRD TEC EXP | 0.001** |
|  | 0 |
| COVID_dummy | 0.318*** |
|  | 0.04 |
| BRD IND * COVID | 0.002*** |
|  | 0.001 |
| LN_TA | 0.255*** |
|  | 0.023 |
| BS | -0.021*** |
|  | 0.004 |
| ROA | 0.005*** |
|  | 0.002 |
| DUA | -0.050* |
|  | 0.026 |
| WBP | 0.162*** |
|  | 0.028 |
| ACI | 0.001** |
|  | 0 |
| LEV | 0.000** |
|  | 0 |
| NPMP | -0.000*** |
|  | 0 |
| Constant | -2.462*** |
|  | 0.539 |
| Year F.E. | Yes |
| Firm F.E | Yes |
| Observations | 10,794 |
| R-squared | 0.201 |
| Note(s): *, **, and *** indicate significance at 10%, 5%, and 1% respectively. wherein, CYB DISC= Cybersecurity Disclosure; BRD IND= Board Independence; BRD TEC EXP= Board Technical Expertise; LN TA= Natural log of total assets; BS= Board Size; ROA= Return on Assets; DUA= Role Duality; WBP= Whistleblower Protection; ACI= Audit Committee Independence; LEV= Leverage; NPMP= Net Profit Margin | |

| Table 12: Heterogeneity by Investor Protection Framework | | |
| --- | --- | --- |
|  | Common Law | Code Law |
| variables | CYB DISC (2) | CYB DISC (1) |
| BRD IND | 0.015*** | 0.010*** |
|  | 0.002 | 0.002 |
| BRD TEC EXP | 0.003** | 0.002* |
|  | 0.001 | 0.001 |
| BRD IND* BRD TEC EXP | 0.000** | 0.000** |
|  | 0 | 0 |
| LN_TA | 0.768*** | 0.768*** |
|  | 0.076 | 0.076 |
| BS | -0.041*** | -0.005 |
|  | 0.007 | 0.009 |
| ROA | 0.008 | 0.001 |
|  | 0.005 | 0.005 |
| DUALITY | -0.129*** | -0.032 |
|  | 0.048 | 0.047 |
| WHICTLEBLRPROTECT | 0.181*** | 0.351*** |
|  | 0.052 | 0.083 |
| ACI | 0.001 | 0.007*** |
|  | 0.001 | 0.001 |
| LEV | -0.000*** | 0 |
|  | 0 | 0 |
| NPMP | 0.005** | 0.070** |
|  | 0.002 | 0.028 |
| Constant | -15.294*** | 2.543*** |
|  | 1.829 | 0.246 |
| Year F.E. | Yes | Yes |
| Firm F.E. | Yes | Yes |
| Observations | 1,644 | 4,898 |
| R-squared | 0.223 | 0.043 |
| Note(s): *, **, and *** indicate significance at 10%, 5%, and 1% respectively. wherein, CYB DISC= Cybersecurity Disclosure; BRD IND= Board Independence; BRD TEC EXP= Board Technical Expertise; LN TA= Natural log of total assets; BS= Board Size; ROA= Return on Assets; DUA= Role Duality; WBP= Whistleblower Protection; ACI= Audit Committee Independence; LEV= Leverage; NPMP= Net Profit Margin | | |
